# Supplementary material for: Cux2(Cutl2) integrates neural progenitor development with cell-cycle progression during spinal cord neurogenesis
Source: Oxford University Press journal article supplement (doi:10.1242/dev.013276), 2008-01-25
Supplement: dev013276-sup-013276-tabless1-2.pdf [file dev013276-sup-013276-tabless1-2.pdf]

**Table S1. Difference in neural tube, mz and vz size in E11.5 neural tubes from multiple sections from *Cux2* transgenic and *Cux2<sup>neo/neo</sup>* mutants relative to control littermates**

|                                                                  | VZ size | MZ size | Total NT size | NT height | NT width |
|------------------------------------------------------------------|---------|---------|---------------|-----------|----------|
| Control versus <i>Cux2</i> transgenic (% difference; n=7)        | 108%    | 114%    | 111%          | 107%      | 110%     |
| Control versus <i>Cux2<sup>neo/neo</sup></i> (% difference; n=7) | 87%*    | 51%*    | 72.2%*        | 98%       | 79.3%*   |

VZ, ventricular zone; MZ, marginal zone; NT, neural tube.  
\*Statistical significance ( $P < 0.05$ ) by Student's *t*-test.

**Table S2. Effect of *Cux2* loss- and gain-of-function on neuronal cell fate in the spinal cord**

|                                        | Control E10.5                              | <i>Cux2<sup>neo/neo</sup></i> mutants E10.5 | <i>Cux2</i> Tg E10.5                               |
|----------------------------------------|--------------------------------------------|---------------------------------------------|----------------------------------------------------|
| Isl1                                   | 67.12±14.6*                                | 88.7±14.5                                   | 53.7±16.1                                          |
| P value ( <i>t</i> -test) <sup>†</sup> |                                            | 0.000003                                    | 0.053                                              |
| Lhx1                                   | 101.1±21.2                                 | 85.2±30.7                                   | 144.6±38.1                                         |
| P value ( <i>t</i> -test)              |                                            | 0.0007                                      | 0.0058                                             |
|                                        | <i>Cux2<sup>neo/neo</sup></i> /Control (%) | <i>Cux2</i> Tg/Control (%)                  | <i>Cux2<sup>neo/neo</sup></i> / <i>Cux2</i> Tg (%) |
| Isl1                                   | 32                                         | -20 <sup>‡</sup>                            | 61                                                 |
| P value ( <i>t</i> -test)              |                                            |                                             | 0.000002                                           |
| Lhx1                                   | -16                                        | 43                                          | -70                                                |
| P value ( <i>t</i> -test)              |                                            |                                             | 0.0007                                             |

*Cux2<sup>neo/neo</sup>* mutants display increased numbers of Isl1-positive cells and decreased Lhx1 numbers in the ventral neural tube at E10.5, relative to control littermates. *Cux2* transgenics (Tg), however, display decreased numbers of Isl1-positive cells and increased numbers of Lhx1-positive cells relative to control embryos in E10.5 ventral neural tubes.

\*Figures are represented as average values±s.d.

<sup>†</sup>P values were determined using a one-tailed Student's *t*-test with two samples, unequal variance.

<sup>‡</sup>Negative sign denotes decrease.
